# Supplementary material for: Exploring the Use of Hydroxytyrosol and Some of Its Esters in Food-Grade Nanoemulsions: Establishing Connection between Structure and Efficiency
Source: MDPI journal article supplement (doi:10.3390/antiox12112002), 2023-11-14
Supplement: s1 [file s1]

**1S.  $^1\text{H}$  NMR and  $^{13}\text{C}$  NMR values for the HT derivatives.**

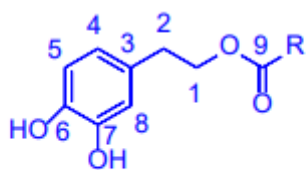

$\text{C}_1$ , R = -H

$\text{C}_{n+1}$  R =  $-(\text{CH}_2)_{n-1}\text{CH}_3$

C1.  $^1\text{H}$  NMR (400 MHz, acetone D6):  $\delta$  7,7 (1H, H-9); 6,76 (d, J = 8,0 Hz, 1H, H-5); 6,75 (d, J = 8 Hz, 1H, H-8); 6,59 (dd, 3J = 8,0 Hz, 4J = 2,0 Hz, 1H, H-4); 4,27 (t, J = 8,0 Hz, 2H, H-1); 2,81 (t, J = 8,0 Hz, 2H, H-2).

$^{13}\text{C}$  NMR (100 MHz, acetone D6):  $\delta$  161,9 (C-9); 145,9 (C-7); 144,6 (C-6); 130,2 (C-3); 121,1 (C-4); 116,8 (C-5); 116,1 (C-8); 65,2 (C-1); 35,0 (C-2).

C2.  $^1\text{H}$  NMR (400 MHz, acetone D6):  $\delta$  6,75 (d, J = 8,0 Hz, 1H, H-5); 6,74 (d, J = 8,0 Hz, 1H, H-8); 6,58 (dd, 3J = 8,0 Hz, 4J = 2,0 Hz, 1H, H-4); 4,15 (t, J = 8,0 Hz, 2H, H-1); 2,76 (t, J = 8,0 Hz, 2H, H2); 1,96 (t, J = 8,0 Hz, 3H, H-10).

$^{13}\text{C}$  NMR (100 MHz, acetone D6):  $\delta$  170,0 (C-9); 145,0 (C-7); 143,6 (C-6); 129,7 (C-3); 120,1 (C-4); 115,9 (C-5); 115,2 (C-8); 64,8 (C-1); 34,2 (C-2); 27,0 (C-10).

C3.  $^1\text{H}$  NMR (400 MHz, acetone D6):  $\delta$  6,76 (d, J = 8,0 Hz, 1H, H-5); 6,75 (d, J = 8,0 Hz, 1H, H-8); 6,58 (dd, 3J = 8,0 Hz, 4J = 2,0 Hz, 1H, H-4); 4,18 (t, J = 8,0 Hz, 2H, H-1); 2,77 (t, J = 8,0 Hz, 2H, H2); 2,28 (quart, J = 8,0 Hz, 2H, H-10); 1,05 (t, J = 8,0 Hz, 3H, H-11).

$^{13}\text{C}$  NMR (100 MHz, acetone D6):  $\delta$  173,5 (C-9); 145,0 (C-7); 143,6 (C-6); 129,7 (C-3); 120,2 (C-4); 116,0 (C-5); 115,2 (C-8); 64,8 (C-1); 34,3 (C-2); 27,0 (C-10); 8,5 (C-11).

C4.  $^1\text{H}$  NMR (400 MHz, acetone D6):  $\delta$  6,76 (d, J = 8,0 Hz, 1H, H-5); 6,75 (d, J = 8,0 Hz, 1H, H-8); 6,58 (dd, 3J = 8,0 Hz, 4J = 2,0 Hz, 1H, H-4); 4,18 (t, J = 8,0 Hz, 2H, H-1); 2,76 (t, J = 8,0 Hz, 2H, H2); 2,24 (t, J = 8,0 Hz, 2H, H-10); 1,58 (sext, J = 8,0 Hz, 2H, H-11); 0,89 (t, J = 8,0 Hz, 3H, H-12).

$^{13}\text{C}$  NMR (100 MHz, acetone D6):  $\delta$  173,5 (C-9); 145,9 (C-7); 144,5 (C-6); 130,6 (C-3); 121,0 (C4); 116,8 (C-5); 116,0 (C-8); 65,6 (C-1); 36,5 (C-2); 35,2 (C-10); 19,0 (C-11); 13,8 (C-12).

C6.  $^1\text{H}$  NMR (400 MHz, acetone D6):  $\delta$  6,75 (d, J = 8,0 Hz, 1H, H-5); 6,74 (d, J = 8,0 Hz, 1H, H-8); 6,58 (dd, 3J = 8,0 Hz, 4J = 2,0 Hz, 1H, H-4); 4,18 (t, J = 8,0 Hz, 2H, H-1); 2,77 (t, J = 8,0 Hz, 2H, H-7 2); 2,26 (t, J = 8,0 Hz, 2H, H-10); 1,57 (quint, J = 8,0 Hz, 2H, H-11); 1,28 (m, 4H, H-12); 0,88 (t, J = 8,0 Hz, 3H, H-13).

<sup>13</sup>C NMR (100 MHz, acetone D6): δ 172,8 (C-9); 145,0 (C-7); 143,6 (C-6); 129,7 (C-3); 120,1 (C-4); 115,9 (C-5); 115,2 (C-8); 64,7 (C-1); 34,3 (C-2); 33,7 (C-10); 31,1 (C-11); 24,5 (C12); 22,1 (C-13); 13,3 (C-14).

C8. <sup>1</sup>H NMR (400 MHz, acetone D6): δ 6,75 (d, J = 8,0 Hz, 1H, H-5); 6,74 (d, J = 8,0 Hz, 1H, H-8); 6,58 (dd, 3J = 8,0 Hz, 4J = 2,0 Hz, 1H, H-4); 4,17 (t, J = 8,0 Hz, 2H, H-1); 2,77 (t, J = 8,0 Hz, 2H, H2); 2,26 (t, J = 8,0 Hz, 2H, H-10); 1,57 (quint, J = 8,0 Hz, 2H, H-11); 1,28 (m, 6H, H-12); 0,88 (t, J = 8,0 Hz, 3H, H-13).

<sup>13</sup>C NMR (100 MHz, acetone D6): δ 172,7 (C-9); 145,0 (C-7); 143,9 (C-6); 129,7 (C-3); 120,1 (C-4); 115,8 (C-5); 115,2 (C-8); 64,7 (C-1); 34,3 (C-2); 33,8 (C-10); 31,5 (C-11); 24,8 (C12); 24,8 (C13); 22,4 (C-14); 22,4 (C-15); 13,4 (C-16).

C10. <sup>1</sup>H NMR (400 MHz, acetone D6): δ 6,75 (d, J = 8,0 Hz, 1H, H-5); 6,74 (d, J = 8,0 Hz, 1H, H-8); 6,58 (dd, 3J = 8,0 Hz, 4J = 2,0 Hz, 1H, H-4); 4,18 (t, J = 8,0 Hz, 2H, H-1); 2,77 (t, J = 8,0 Hz, 2H, H2); 2,28 (t, J = 8,0 Hz, 2H, H-10); 1,57 (quint, J = 8,0 Hz, 2H, H-11); 1,29 (m, 12H, H-12); 0,88 (t, J = 8,0 Hz, 3H, H-13). <sup>13</sup>C NMR (100 MHz, acetone D6): δ 172,7 (C-9); 145,0 (C-7); 143,6 (C-6); 129,7 (C-3); 120,3 (C-4); 115,9 (C-5); 115,1 (C-8); 64,6 (C-1); 34,3 (C-2); 33,8 (C-10); 31,7 (C-11); 24,8 (C12); 24,8 (C13); 24,8 (C14); 22,4 (C-15); 22,4 (C-16); 22,4 (C-17); 13,5 (C-18).

C12. <sup>1</sup>H NMR (400 MHz, acetone D6): δ 6,75 (d, J = 8,0 Hz, 1H, H-5); 6,74 (d, J = 8,0 Hz, 1H, H-8); 6,58 (dd, 3J = 8,0 Hz, 4J = 2,0 Hz, 1H, H-4); 4,17 (t, J = 8,0 Hz, 2H, H-1); 2,77 (t, J = 8,0 Hz, 2H, H2); 2,26 (t, J = 8,0 Hz, 2H, H-10); 1,57 (quint, J = 8,0 Hz, 2H, H-11); 1,29 (m, 16H, H-12); 0,88 (t, J = 8,0 Hz, 3H, H-13).

<sup>13</sup>C NMR (100 MHz, acetone D6): δ 172,7 (C-9); 145,0 (C-7); 143,6 (C-6); 129,7 (C-3); 120,1 (C-4); 115,8 (C-5); 115,2 (C-8); 64,7 (C-1); 34,3 (C-2); 33,8 (C-10); 31,7 (C-11); 24,8 (C12); 24,8 (C13); 24,8 (C14); 24,8 (C15); 22,4 (C-16); 22,4 (C-17); 22,4 (C-18); 22,4 (C-19); 13,5 (C-20).

C16. <sup>1</sup>H NMR (400 MHz, acetone D6): δ 6,75 (d, J = 8,0 Hz, 1H, H-5); 6,74 (d, J = 8,0 Hz, 1H, H-8); 6,58 (dd, 3J = 8,0 Hz, 4J = 2,0 Hz, 1H, H-4); 4,17 (t, J = 8,0 Hz, 2H, H-1); 2,76 (t, J = 8,0 Hz, 2H, H2); 2,26 (t, J = 8,0 Hz, 2H, H-10); 1,57 (quint, J = 8,0 Hz, 2H, H-11); 1,29 (m, 24H, H-12); 0,88 (t, J = 8,0 Hz, 3H, H-13).

<sup>13</sup>C NMR (100 MHz, acetone D6): δ 173,6 (C-9); 145,9 (C-7); 144,5 (C-6); 130,6 (C-3); 122,0 (C-4); 116,8 (C-5); 116,0 (C-8); 65,6 (C-1); 35,2 (C-2); 34,7 (C-10); 32,7 (C-11); 25,7 (C12); 25,7 (C13); 25,7 (C14); 25,7 (C15); 25,7 (C16); 25,7 (C17); 23,3 (C-18); 23,3 (C-19); 23,3 (C-20); 23,3 (C-21); 23,3 (C-22); 23,3 (C-23); 14,4 (C-24).
